# Supplementary material for: Shear-Viscosity-Dependent Effect of a Gum-Based Thickening Product on the Safety of Swallowing in Older Patients with Severe Oropharyngeal Dysphagia
Source: MDPI journal article supplement (doi:10.3390/nu15143279), 2023-07-24
Supplement: s1 [file s1]

Supplementary figures

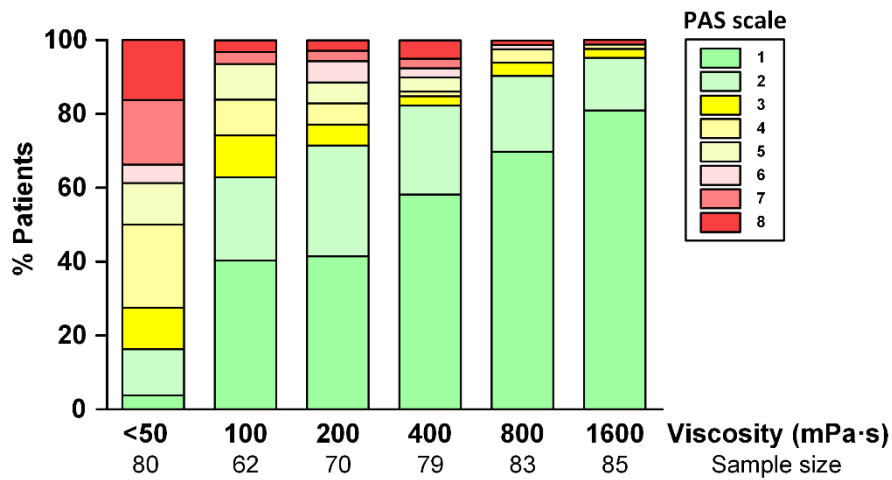

**Supplementary Figure S1.** Prevalence of Penetration Aspiration Scale (PAS) levels at each viscosity assessed. The number of patients assessed at each viscosity level (sample size) is also depicted.

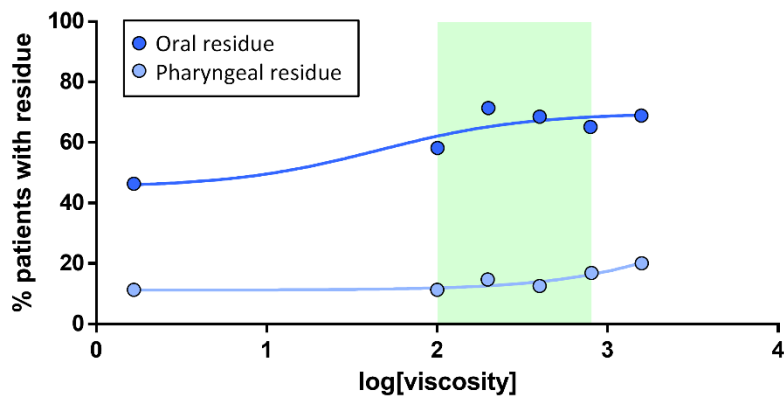

**Supplementary Figure S2.** Prevalence of patients with oral or pharyngeal residue at each viscosity level assessed.

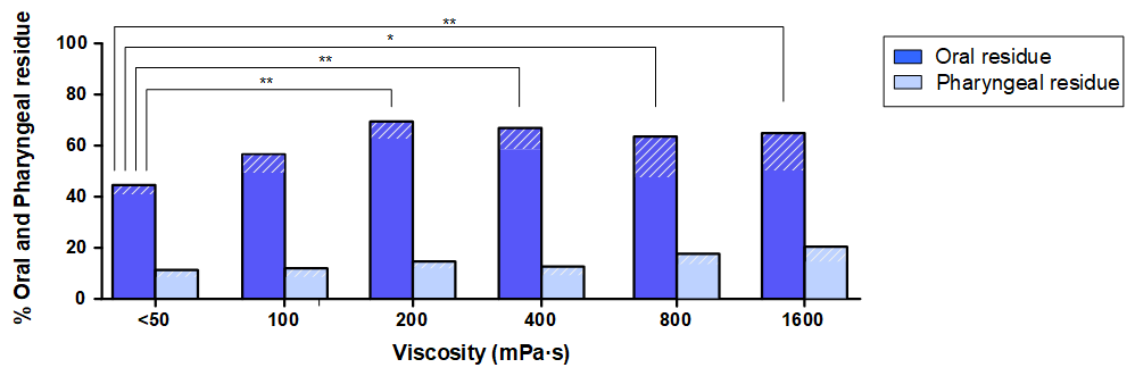

**Supplementary Figure S3.** Effect of increasing viscosity on the prevalence of patients with oral and pharyngeal residue according to Robins Scale (Coating vs Pooling). The striped frame marks pool residue. \* $p < 0.05$ ; \*\* $p < 0.01$ .

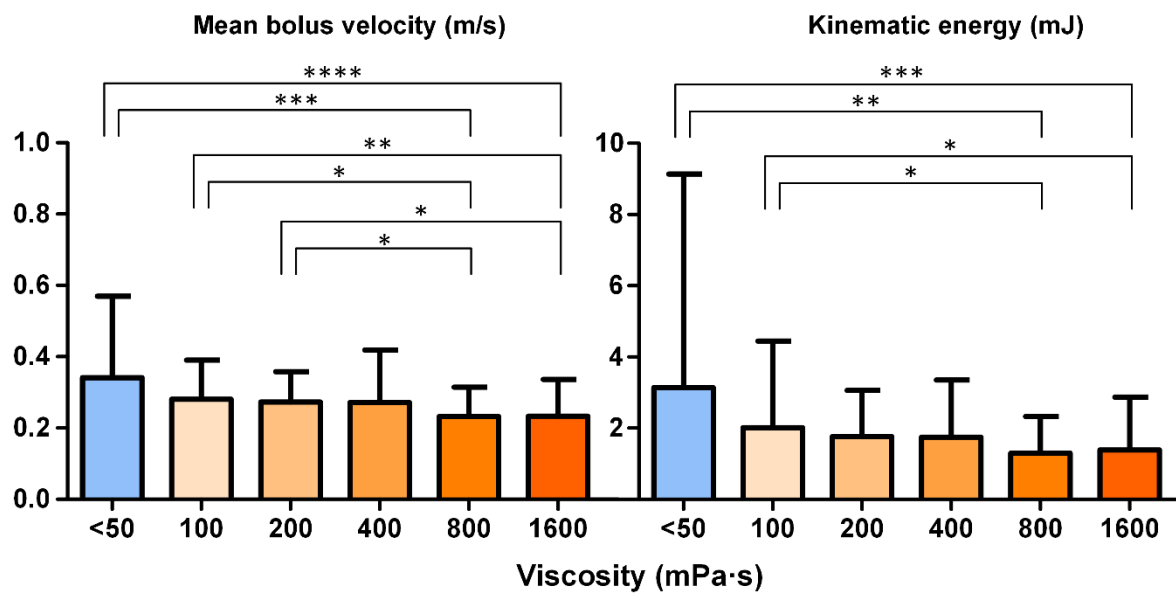

**Supplementary Figure S4.** Mean bolus velocity and kinetic energy for each viscosity level assessed. \* $p < 0.05$ ; \*\* $p < 0.01$ ; \*\*\* $p < 0.001$ ; \*\*\*\* $p < 0.0001$ .
